# Supplementary material
Source: MDPI journal article supplement (https://www.mdpi.com/2673-7655/4/1/5)
Supplement: s1 [file s1 › crops-2806103-SI.pdf]

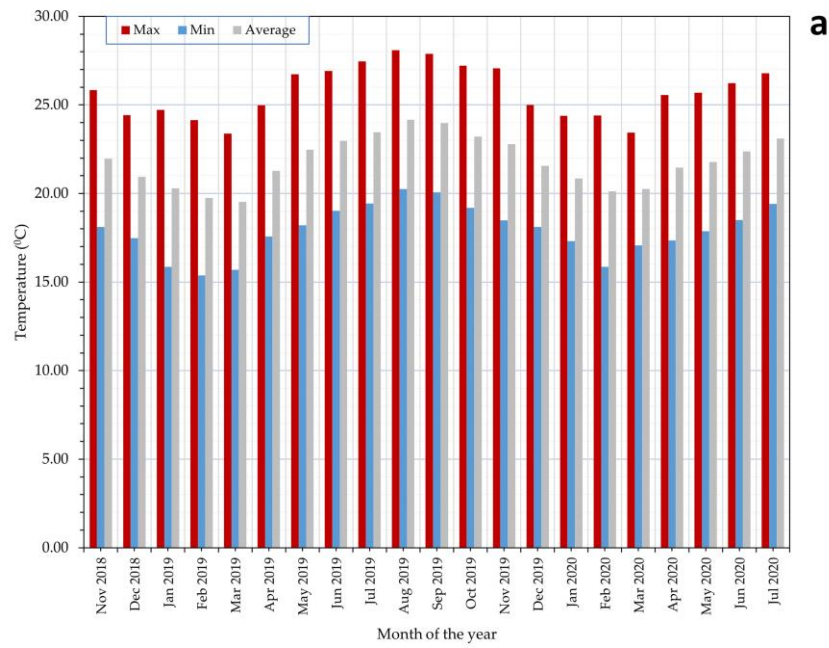

Figure S1. Average monthly temperature of the experimental site. 2024

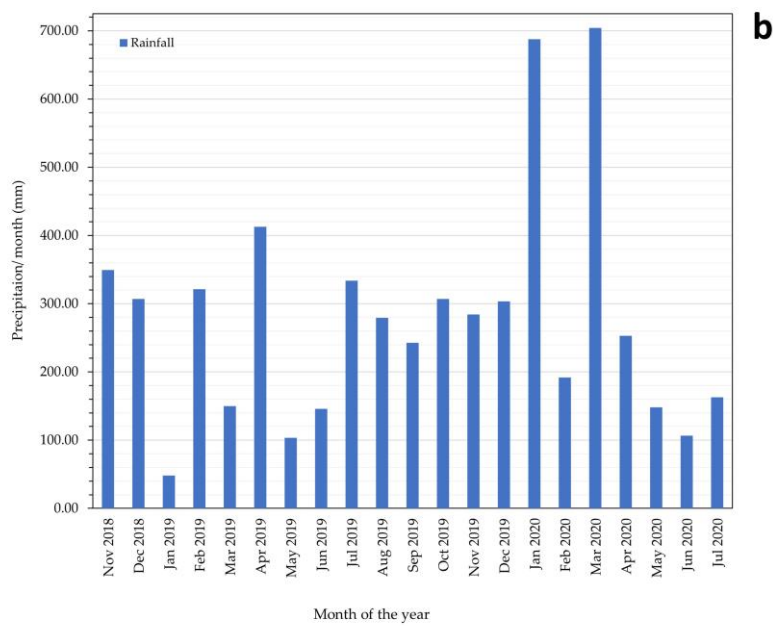

Figure S2: Total monthly precipitation of the experimental site. (2024).
